1 **SapL1: A New Target Lectin for the Development of Antiadhesive**

2 **Therapy Against *Scedosporium apiospermum*:**

3 **Dania Martínez-Alarcón<sup>1,2</sup>, Roland J. Pieters<sup>2</sup>, Annabelle Varrot<sup>1\*</sup>.**

4 1 Univ. Grenoble Alpes, CNRS, CERMAV, 38000 Grenoble, France.

5 [daniamartinezalarcon@gmail.com](mailto:daniamartinezalarcon@gmail.com), [annabelle.varrot@cermav.cnrs.fr](mailto:annabelle.varrot@cermav.cnrs.fr)

6 2 Department of Chemical Biology & Drug Discovery, Utrecht Institute for

7 Pharmaceutical Sciences, Utrecht University, P.O. Box 80082, NL-3508 TB Utrecht,

8 The Netherlands. [R.J.Pieters@uu.nl](mailto:R.J.Pieters@uu.nl)

9 \* Corresponding author

10 Email: [annabelle.varrot@cermav.cnrs.fr](mailto:annabelle.varrot@cermav.cnrs.fr)

11

12 **Short title:** First lectin characterized in *Scedosporium apiospermum*.

13 **Keywords:** fucolectin, *Scedosporium apiospermum*, host recognition, glycans,

14 antiadhesive therapy.

15

16

## 17 **Abstract**

18 *Scedosporium apiospermum* is an emerging opportunistic fungal pathogen responsible  
19 for life-threatening infections in immunocompromised patients. This fungus  
20 exhibits limited susceptibility to all current antifungals and, due its emerging  
21 character, its pathogenicity and virulence factors remain largely unknown.  
22 Carbohydrate binding proteins such as lectins are involved in host-pathogen  
23 interactions and may constitute valuable therapeutic targets to inhibit microbial  
24 adhesion to the host cells by using carbohydrate mimics. However, such lectins are  
25 still unidentified in *S. apiospermum*. Here, we present the first report of the  
26 identification and characterization of a lectin from *S. apiospermum* named SapL1.  
27 SapL1 is homologous to the conidial surface lectin FleA from *Aspergillus fumigatus*,  
28 known to be involved in the adhesion to host glycoconjugates present in human  
29 lung epithelium. The present report includes a detailed strategy to achieve SapL1  
30 soluble expression in bacteria, its biochemical characterization, an analysis of its  
31 specificity and affinity by glycan arrays and isothermal titration calorimetry (ITC),  
32 as well as the structural characterization of its binding mode by X-ray  
33 crystallography. The information gathered here contributes to the understanding of  
34 glycosylated surface recognition by *Scedosporium* species and is essential for the  
35 design and development of antiadhesive glycodrugs targeting SapL1.

36

## 37 **Author summary**

38 The rate of infections caused by the airborne microfungus *Scedosporium apiospermum*  
39 has increased in the recent decades, especially in immunocompromised patients. It  
40 represents a therapeutic challenge due to its low susceptibility to all current  
41 antifungals, and the subsequent high mortality rate in disseminated scedosporiosis.  
42 Recently, the development of antiadhesive therapy has emerged as a novel strategy  
43 for the treatment and prevention of fungal infections. It aims to avoid the first step  
44 of infections, adhesion, by blocking the proteins responsible for attachment of the  
45 pathogens to the host-cells. Unfortunately, in the case of *S. apiospermum*, those  
46 proteins remain unknown but now we have identified a lectin (SapL1) encoded in  
47 its genome that is possibly involved in this process. In order to achieve a deep  
48 understanding of SapL1 specificity and interactions, we produced recombinant  
49 SapL1 in bacteria to carry out its biochemical and structural characterization. As  
50 predicted by our bioinformatics studies, SapL1 is a fucose binding lectin and we  
51 elucidated the interactions responsible for its binding specificity. Together, these  
52 informations should help to design efficient SapL1 inhibitors and therefore to  
53 generate potential antiadhesive drugs against this pathogen. Additionally, we have  
54 shown that SapL1 belongs to a highly conserved family of lectins that are present in  
55 other pathogens. Thus, the information presented here might also be useful for a  
56 broad spectrum drug development.

## 57 **Introduction**

58 During the last decades, an increased incidence of invasive infections, especially in  
59 immunosuppressed patients, has been caused by previously rare fungal pathogens  
60 [1]. Among those pathogenic fungi, species from the *Scedosporium* genus are  
61 particularly dangerous since their mortality rate may be over 80% [2]. *Scedosporium*  
62 infections mainly affect immunocompromised patients such as solid organ  
63 transplant (SOT) or hematopoietic stem cell transplant (HSCT) recipients, or patients  
64 with chronic granulomatous disease. Together with *Fusarium* species and some  
65 dematiaceous fungi, *Scedosporium* species are responsible for approximately 10% of  
66 the mycosis caused by filamentous fungi in hematopoietic cell transplant recipients  
67 and up to 19% in solid organ transplant patients [3]. In addition, *Scedosporium*  
68 species rank second among the filamentous fungi that colonize the respiratory tract  
69 of people with cystic fibrosis (CF), after *Aspergillus fumigatus*. Because of the  
70 propensity of these fungi to disseminate in case of immune deficiency, this fungal  
71 colonization of the airways is considered in some centers as a contraindication to  
72 lung transplantation which remains the ultimate treatment in CF [4]. Apart from  
73 lung transplantation, this fungal colonization of the airways, which usually starts in  
74 the adolescence and becomes chronic in up to 19% of the patients, may also lead to  
75 a chronic inflammation and sometimes to an allergic bronchopulmonary mycosis  
76 [2]. Furthermore, it has been reported that some species of this genus can also affect  
77 immunocompetent patients [5].

78 The genus *Scedosporium* comprises more than ten species (*Scedosporium angustum*, *S.*  
79 *apiospermum*, *S. aurantiacum*, *S. boydii*, *S. cereisporum*, *S. dehoogii*, *S. desertorum*, *S.*  
80 *ellipsoideum*, *S. fusoidium*, *S. minutisporum*, *S. rarisporum* and *S. sanyaense*) whose  
81 taxonomy has been previously described based on molecular phylogenetic by using  
82 the sequences of four genetic loci [2,6]. However only the genome of *S. boydii*, *S.*

83 *aurantiacum*, *S. dehoogii* and *S. apiospermum* have been completely sequenced to date  
84 [7–9]. Among *Scedosporium* species, *S. apiospermum* (formerly considered as the  
85 asexual form of *Pseudallescheria boydii*) is the most outstanding. This cosmopolitan  
86 microfungus is responsible for localized to severe or fatal disseminated infections in  
87 humans and is one of the most common *Scedosporium* species (with *S. boydii* and *S.*  
88 *aurantiacum*) capable to colonize chronically the lungs of CF patients [3,10].

89 The treatment of *Scedosporium* infections is challenging because its efficacy depends  
90 on timely diagnosis, which is based on morphological detection by microscopy,  
91 histological analysis, and culture on selective media. This process is time consuming  
92 and may lead to false negative results, especially from respiratory secretions of  
93 patients with CF because of the common co-colonization by other fungi or bacteria  
94 [2]. Furthermore, *Scedosporium* species display a primary resistance to classical  
95 antifungals such as 5-flucytosine, amphotericin B, and the first-generation triazole  
96 drugs, fluconazole or itraconazole and exhibit a limited susceptibility to the newest  
97 generations of antifungal drugs, *i.e.* echinocandins, voriconazole and isavuconazole  
98 [2,11]. Nowadays, the first-line treatment for *Scedosporium* infections involves a  
99 combination therapy that includes the use of voriconazole in conjunction with other  
100 antifungals [11,12]. However, due to common recurrences, even without  
101 interruption of treatment, the recovery rates are poor and mortality remains over  
102 65% while it is almost 100% when dissemination occurs, a reason why it has aroused  
103 special attention despite its emerging character [12,13].

104 *Scedosporium* infections begin with conidial adherence to tissues, followed by  
105 germination and hyphal elongation [14]. This adherence process allows it to avoid  
106 cleansing mechanisms aimed to eradicate the invading pathogens and represents  
107 the initial step towards infection [14–17]. Conidial adhesion is mediated by cell  
108 surface molecules (CSM), including different types of carbohydrates such as

109 polysaccharides and glycoconjugates. Some of the most important carbohydrate  
110 CSM described to date for *Scedosporium* species include peptidorhamnomannans  
111 (PRMs) [18–20]  $\alpha$ -glucan [21], melanin [22], ceramide monohexosides [18,23], N-  
112 acetyl-D-glucosamine-containing molecules [24] and mannose/glucose-rich  
113 glycoconjugates [18]. The presence and/or abundance of these molecules on the cell  
114 surface varies according to the stage of development and is of great relevance to  
115 understand fungal pathobiology [18]. The carbohydrate binding proteins known as  
116 lectins also act as CSMs and were shown to have an essential role during  
117 pathogenesis. However, the knowledge about lectins in emerging microfungi is very  
118 limited to date.

119 Since some lectins from microorganisms have been demonstrated to be involved in  
120 the host recognition and adhesion process, they have been used to develop anti-  
121 adhesive therapy through the use of carbohydrates and their mimics [15–17,25–29].  
122 This approach is particularly promising since it does not kill the pathogen nor arrest  
123 its cell cycle. Consequently, resistance frequencies are rare [16,26] and expected side  
124 effects in non-target tissues are lower than those caused by conventional antifungal  
125 compounds. This may allow its implementation as a prophylactic therapy for  
126 immunocompromised patients [17,27].

127 Due to the emerging character of *Scedosporium apiospermum*, there is very limited  
128 information on its mechanisms of recognition and anchoring to the host.  
129 Furthermore, lectins from this microorganism have not been characterized to date,  
130 what hinders the development of an anti-adhesive therapy. Conversely, closely  
131 related filamentous fungi were investigated leading to the identification and  
132 characterization of their host binding modes. For example, in *A. fumigatus*, which is  
133 a saprophytic mold also responsible for bronchopulmonary infections in receptive  
134 hosts, the lectin FleA (or AFL) was identified and revealed a role in host-pathogen

135 interactions [30]. FleA is a six-bladed  $\beta$ -propeller homodimer located on the conidial  
136 surface that recognize human blood group antigens and mediates *A. fumigatus*  
137 binding to airway mucins and macrophages glycoproteins in a fucose-dependent  
138 manner [31]. In healthy individuals, this anchorage is critical for the mucociliary  
139 clearance process and the macrophagy, in fact it has been described that fleA-  
140 deficient ( $\Delta$ fleA) conidia are even more pathogenic than wild type (WT) conidia  
141 both, in healthy and chemically immunocompromised mice [31,32]. However, CF  
142 patients represent a very particular scenario because the mucus in their lungs is  
143 thicker, in relation with mucin overproduction and the high content of calcium ions,  
144 which modulates the supramolecular organization of MUC5B by protein cross-  
145 linkages [32,33]. This contributes to the suboptimal transport properties of mucus  
146 and compromises the pathogen clearance mechanisms [32]. Furthermore, the  
147 aberrant glycosylation of the mucins MUC5B and MUC5B in CF lungs causes,  
148 among other things, an increase in the abundance of sialyl-Lewis X and Lewis X  
149 determinants in the non-reducing end of mucins carbohydrate chains [34,35], which  
150 can also be translated as an increase in the fucose content. Therefore, in this context,  
151 the FleA (and homologous proteins) anchoring to the mucus layer plays an essential  
152 role in the colonization of the CF lungs by *A. fumigatus*.

153 Here, we have used the recently sequenced genome of *S. apiospermum* [9], to identify  
154 a putative homologue of FleA that we have called SapL1 for *Scedosporium*  
155 *apiospermum* Lectin 1. The present report comprises SapL1 identification, its  
156 production in bacteria, an analysis of the fine specificity and affinity of the  
157 recombinant protein, as well as its structural characterization by X-ray  
158 crystallography.

159

## 160 **Results**

### 161 **Production and purification of SapL1**

162 The hypothetical protein XP\_016640003.1 (EMBL accession number), encoded by  
163 SAPIO\_CDS9261 and from now on referred as SapL1, was identified through data  
164 mining using the FleA (pdb entry 4D4U [30]) sequence as bait into the genome of  
165 the reference strain *S. apiospermum* IHEM 14462 [9]. During the sequence analysis,  
166 we identified that the first 74 amino acids of the putative protein (Uniprot  
167 A0A084FYP2) are a very disordered region that is not present in any other protein  
168 of the same family. We suspected that this peptide could derived from a  
169 misplacement of the open reading frame (ORF) of SapL1 during the genome  
170 assembly and that its sequence actually starts at methionine-75 (S1 Fig). The SapL1  
171 coding sequence (from Met-75) was fused to an N-terminal 6xHis tag cleavable by  
172 the Tobacco Etch virus protease (TEV) under regulation of *trc* and *T7* promoters into  
173 pProNde and pET-TEV vectors, respectively (Fig 1A). Expression was performed in  
174 *Escherichia coli* and purification was carried out using immobilized metal affinity  
175 chromatography (IMAC). Unfortunately, the original expression yield with both  
176 vectors ( $\sim 0.35$  mg·L<sup>-1</sup> of culture) was too low to proceed with characterization  
177 studies. Therefore, we explored new alternatives to enhance the expression. First,  
178 the thioredoxin protein (Trx) as well as 6-His tag and TEV cleavage site were fused  
179 at the N-terminus of SapL1 by subcloning into the pET32-TEV vector (Fig 1A). This  
180 strategy substantially increased the SapL1 production yield but most of the protein  
181 remained insoluble as part of inclusion bodies (Fig 1B). A wide range of expression  
182 conditions were subsequently assayed to achieve sufficient soluble expression by  
183 modification of various parameters such as growth temperature, host strain, inducer  
184 concentration, optical density of the culture at induction, culture duration, etc. Sixty-  
185 nine different sets of parameters were assayed (S1 Table) and it was possible to



186 improve the yield up to 4 mg·L<sup>-1</sup> (Fig 1C). The best set of conditions for SapL1  
187 expression was using *E. coli* strain TRX, pProNde vector, LB media, growth at 37°C  
188 and 160 rpm until OD<sub>600</sub> = 0.4, before a switch of the temperature to 16°C and  
189 overnight induction at OD 0.8 with 0.05 mM IPTG and 1% L-rhamnose (Rh).

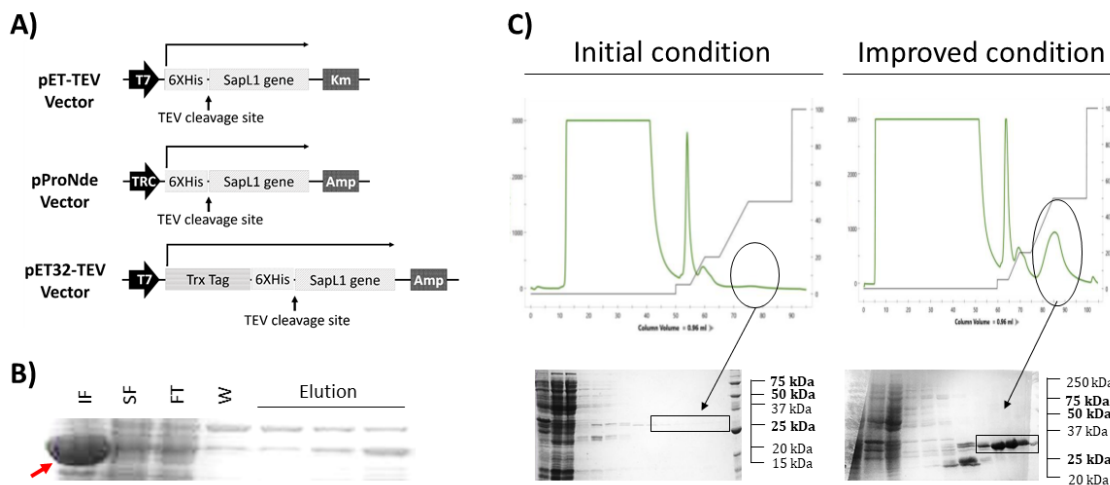

191 **Fig 1. SapL1 production.** A) Schematic representation of the genetic constructs used for the  
192 expression of SapL1. B) SDS-PAGE of fractions collected from SapL1 purification using pET32-TEV  
193 vector. IF: Insoluble fraction, SF: Soluble fraction, FT: Flow through, W: wash and elution, from right  
194 to left respectively. Red arrow indicates inclusion bodies from insoluble fractions. C) Representative  
195 chromatograms of SapL1 purification before and after the process with their respective profile on  
196 15% SDS-polyacrylamide gels (insoluble fraction, soluble fraction, flow through, washing and  
197 elution, from left to right respectively). The fractions containing SapL1 are delimited.

### 198 Rhamnose influence on SapL1 solubility

199 Interestingly, during the optimization of the expression conditions, we found that  
200 rhamnose (Rh) plays an essential role in the solubility and stability of SapL1.  
201 Therefore, we performed a new set of experiments to demonstrate the correlation  
202 between the amount of protein recovered after purification and the Rh concentration  
203 in the media. For this, we investigated SapL1 expression under the previously  
204 described conditions modified by supplementation of the culture medium with  
205 different concentrations of Rh (0.1%, 0.15%, 0.2%, 0.5% and 1%). Purification

206 parameters were set to obtain high purity product and kept identical for all  
207 experiments. Fig 2 shows the chromatograms obtained for representative  
208 concentrations accompanied by their respective SDS-PAGE profile. To quantify  
209 SapL1 expression in these experiments, we integrated the area under peaks  
210 corresponding to the protein (Fig 2, black bars). Thus, we confirmed that SapL1  
211 recovery is directly proportional to the Rh concentration in the culture medium.

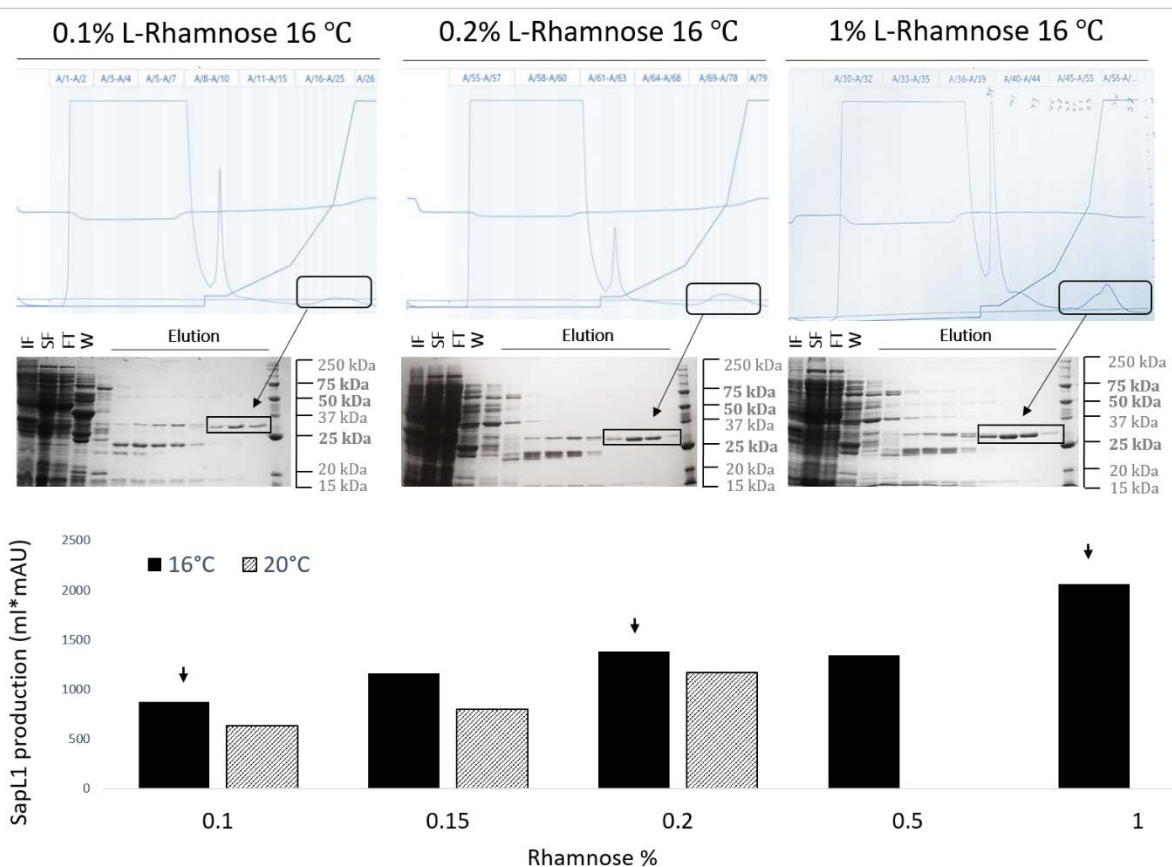

212

213 **Fig 2. Rhamnose influence on SapL1 solubility.** A) SapL1 purification chromatograms at 0.1%, 0.2%,  
214 and 1% rhamnose with their corresponding SDS-PAGE profile. IF: Insoluble fraction, SF: Soluble  
215 fraction, FT: Flow through, W: wash and elution, from left to right respectively. Black rectangles  
216 indicate the elution peaks and elution fractions containing SapL1 on SDS-polyacrylamide gels. B)  
217 Numerical values derived from the integration of areas under the peaks corresponding to SapL1 for  
218 each experiment. Black and striped bars represent the results for experiments performed at 16°C and  
219 20°C, respectively.

220 Then, the experiment was repeated at three different concentrations (0.1%, 0.15%,  
221 0.2%) using 20°C as the induction temperature, and production behavior was similar  
222 to that found at 16°C, but with lower performance.

223 Additional experiments also showed that SapL1 expression can be induced at high  
224 concentration of rhamnose in a dose dependent manner, even without addition of  
225 IPTG when the pProNde vector is used (data not shown). For this reason, we initially  
226 considered that the higher production rates of SapL1 could be attributed to the  
227 dissociation of the *LacI*-DNA complex caused by an increase in the cytosolic  
228 potassium concentration since the accumulation of this ion is one of the main  
229 adaptive responses of *E. coli* to hypertonic shocks, and its concentration has been  
230 correlated to the loss of interactions between DNA and proteins in *in vitro* assays  
231 [36–38]. However, previous reports have demonstrated that, *in vivo*, the effects of  
232 macromolecular crowding caused by plasmolysis (the reduction of intracellular  
233 water content, as an adaptive response to osmotic shock) on the activity of  
234 cytoplasmic proteins, is sufficient to buffer the kinetics of association of DNA-  
235 protein against changes in  $[K^+]$  [38,39]. Thus, it seems that the higher recovery rates  
236 of SapL1 is actually caused by a combination of two main parameters: 1) the leak of  
237 genetic repression by dissociation of the *LacI*-DNA complex (characteristic of *lac*  
238 promoters) and 2) a positive effect on the solubility and folding of the protein due  
239 to the increased concentration of organic osmoregulators, whose synthesis is  
240 induced in *E. coli* as an adaptive response to the external hypertonicity caused, in  
241 this case, by the addition of rhamnose to the culture medium [36–44]. This  
242 hypothesis was later supported by the finding that the addition of glycerol, instead  
243 of rhamnose, displays the same effect on production and solubility of SapL1 (data  
244 not shown). Plasmolysis may also play an essential role in SapL1 stabilization, since  
245 it has been shown that macromolecular crowding has positive effects on protein

246 folding and in some cases it can drive self-association of improper folded proteins  
247 into functional oligomers [38].

### 248 **Biochemical characterization**

249 We assayed the thermal stability of SapL1 in 26 different buffers in a pH range of 5  
250 to 10 through a Thermal Shift Assay (TSA). The most suitable condition for this  
251 protein was MES buffer 100 mM pH 6.5, where a single denaturing event at a  $T_m$  of  
252 55°C was observed (S2 Fig). Then, to estimate the molecular size of the native  
253 protein, we performed size exclusion chromatography using an ENrich™ SEC 70  
254 column (Bio-Rad) and 20 mM MES, 100 mM NaCl, pH 6.5 as the mobile phase.  
255 However, the protein displayed strong non-specific interactions with the matrix of  
256 the column, and SapL1 could not be eluted even using 5 M of NaCl. Interestingly, it  
257 could be recovered when the buffer was supplemented with 20 mM  $\alpha$ -methyl  
258 fucoside or L-rhamnose, evidencing similar effects on SapL1 elution for both sugars.  
259 Due to the impossibility to estimate the molecular weight of SapL1 by size exclusion  
260 chromatography on this resin, we performed measurements in solution using  
261 Dynamic Light Scattering (DLS). We obtained a monodisperse peak corresponding  
262 to a protein of  $72 \pm 29.4$  kDa corroborating that SapL1 forms dimers as FleA and  
263 other proteins of this family (monomer MW: 40 kDa, data not shown) [30]. The range  
264 of the standard deviation also suggested an ellipsoidal shape, which is characteristic  
265 for the dimers in this lectin family [45].

### 266 **Carbohydrate binding properties**

267 A hemagglutination assay showed that recombinant SapL1 agglutinated rabbit red  
268 blood cells at  $0.97 \mu\text{g}\cdot\text{ml}^{-1}$  (Fig 3A). It confirms that the recombinant lectin is active  
269 and that its heterologous production in *E. coli* did not alter its hemagglutinating  
270 properties.

271 To identify the potential ligands of SapL1 on epithelial cell surfaces, we submitted  
272 SapL1 to the glycan array version 5.4 of the Consortium for Functional Glycomics  
273 (USA) consisting of 585 mammalian glycans. It was labelled with Fluorescein  
274 Isothiocyanate (FITC) in a molar ratio of 0.426 and its binding properties were  
275 analysed at two different concentrations (5 and 50  $\mu\text{g}\cdot\text{mL}^{-1}$ ). As expected from its  
276 homology with FleA, SapL1 recognizes fucosylated oligosaccharides independently  
277 of the fucose linkage. The  $\alpha$ 1-2 and  $\alpha$ 1-3/4 linked fucosides displayed the highest  
278 affinity whilst  $\alpha$ 1-6 linked ones, the lowest. The weakest interactions with  
279 fucosylated compounds were reported for branched oligosaccharides (S3 Fig). The  
280 affinity of SapL1 for L-fucose and  $\alpha$ -methyl-fucoside was determined by Isothermal  
281 Titration Calorimetry (ITC) and the  $K_d$  was found to be 225  $\mu\text{M}$  and 188  $\mu\text{M}$ ,  
282 respectively with stoichiometry fixed to 1 since the measurements were done in the  
283 presence of an excess of ligand (Fig 3B). These values are in agreement with the  
284 affinity constant (around 110  $\mu\text{M}$ ) reported for FleA for  $\alpha$ -methyl-fucoside [46]. No  
285 binding interaction was observed for SapL1 with rhamnose by ITC (data not shown).

286 Analysis of the glycans constituting blood group determinants revealed that SapL1  
287 binds to all epitopes with a preference for H type 2 ( $\text{Fuc}\alpha$ 1-2 $\text{Gal}\beta$ 1-4 $\text{GlcNAc}\beta$ ) then  
288 Lewis<sup>a</sup> ( $\text{Gal}\beta$ 1-3( $\text{Fuc}\alpha$ 1-4) $\text{GlcNAc}\beta$ ) and Lewis<sup>x</sup> ( $\text{Gal}\beta$ 1-4( $\text{Fuc}\alpha$ 1-3) $\text{GlcNAc}\beta$ ).  
289 However, most of the recognized branched oligosaccharides contained the core  
290 fucose  $\text{Fuc}\alpha$ 1-6. Epitopes with two fucose units, such as Lewis<sup>b</sup> and fucosylated  
291 poly lactosamine, were also well recognized. Addition of a galactose or a GalNAc as  
292 in blood group B or A antigens did not impair  $\text{Fuc}\alpha$ 1-2 recognition (Fig 3C). Spacers  
293 used to join the carbohydrates to the chip also display a strong influence on binding.  
294 It is remarkable that 70% of the 90 positive binders contained either the spacer Sp0  
295 ( $\text{CH}_2\text{CH}_2\text{NH}_2$ ) or Sp8 ( $\text{CH}_2\text{CH}_2\text{CH}_2\text{NH}_2$ ). Those spacers also display a strong  
296 influence on binding, especially for small glycans such as  $\text{Gal}\alpha$ 1-3( $\text{Fuc}\alpha$ 1-2) $\text{Gal}\beta$ 1-

297 4(Fuca1-3)GlcNAc $\beta$  which was recognized when attached to Sp0 but not to Sp8.  
 298 This may be due to a steric hindrance caused by the modification of carbohydrate  
 299 presentation on the surface of the chip.

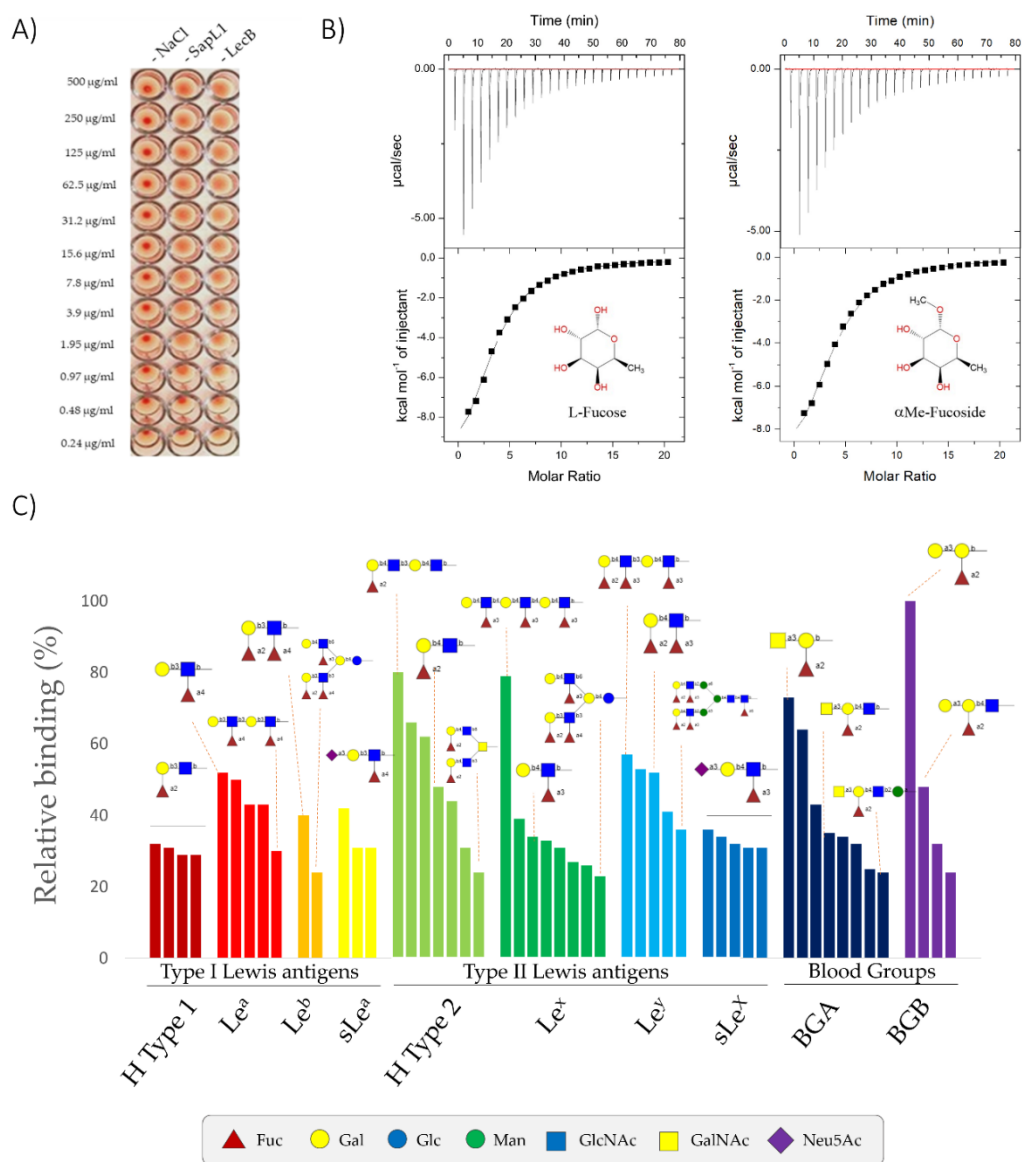

300

301 **Fig 3. SapL1 carbohydrate binding properties.** A) Hemagglutination assay of SapL1 on fresh rabbit  
 302 erythrocytes. Negative and positive controls consist of 150 mM NaCl and the lectin LecB from  
 303 *Pseudomonas aeruginosa*, respectively. B) Titration of SapL1 with L-fucose and  $\alpha$ -methyl-fucoside with  
 304 the thermogram and the integration displayed at the top and bottom, respectively. C) Analysis of the  
 305 interactions of SapL1 with blood group epitopes. The graph shows the relative binding of SapL1 to  
 306 glycans containing Lewis and ABH blood group antigens from the 90 hits identified as binders.

## 307 Overall structure of SapL1

308 SapL1 was co-crystallized with  $\alpha$ -methyl-fucoside and the structure of the complex  
 309 was solved by molecular replacement at 2.3 Å resolution in the P2<sub>1</sub> space group using  
 310 the coordinates of FleA (PDB code 4D4U [30]) as the search model. Data and  
 311 refinement statistic are described in Table 1.

312 **Table 1.** Data-collection and refinement statistics.

| <b>Data collection</b>                                                                                    |                                     |            |
|-----------------------------------------------------------------------------------------------------------|-------------------------------------|------------|
| <b>Beamline</b>                                                                                           | SOLEIL Proxima 1                    |            |
| <b>Wavelength (Å)</b>                                                                                     | 0.97857                             |            |
| <b>Space group</b>                                                                                        | P2 <sub>1</sub>                     |            |
| <b>Unit cell dimensions a, b, c (Å), <math>\alpha</math>, <math>\beta</math>, <math>\gamma</math> (°)</b> | 76.06, 45.66, 83.48, 90, 105.05, 90 |            |
| <b>No. of monomers in ASU</b>                                                                             | 2                                   |            |
| <b>Resolution (Å)</b>                                                                                     | 40.0 – 2.4 (2.46-2.4)               |            |
| <b>Rmerge</b>                                                                                             | 0.085 (0.428)                       |            |
| <b>Rpim</b>                                                                                               | 0.07 (0.356)                        |            |
| <b>Mean I/<math>\sigma</math> (I)</b>                                                                     | 5.3 (1.6)                           |            |
| <b>Completeness (%)</b>                                                                                   | 98.2 (98.4)                         |            |
| <b>Multiplicity</b>                                                                                       | 2.7 (2.7)                           |            |
| <b>CC1/2</b>                                                                                              | 0.991(0.7)                          |            |
| <b>No. reflections /No. Unique reflections</b>                                                            | 58305/ 21570                        |            |
| <b>Refinement</b>                                                                                         |                                     |            |
| <b>Resolution (Å)</b>                                                                                     | 20.0-2.3                            |            |
| <b>No. of reflections in working set / Free set</b>                                                       | 21561 / 1089                        |            |
| <b>R work/ R free</b>                                                                                     | 17.5 / 24.0                         |            |
| <b>R.m.s Bond lengths (Å)</b>                                                                             | 0.017                               |            |
| <b>Rmsd Bond angles (°)</b>                                                                               | 1.94                                |            |
| <b>Rmsd Chiral (Å<sup>3</sup>)</b>                                                                        | 0.087                               |            |
| <b>No. atoms / Bfac (Å<sup>2</sup>)</b>                                                                   | Chain A                             | Chain B    |
| <b>Protein</b>                                                                                            | 2222/32.64                          | 2220/40.83 |
| <b>Ligand and heterogen</b>                                                                               | 89/31.56                            | 66/36.914  |
| <b>Waters</b>                                                                                             | 111/31.018                          | 69/33.206  |
| <b>Ramachandran Allowed / Favored/ Outliers (%)</b>                                                       | 96 / 4 / 0                          | 95 / 4 / 1 |
| <b>PDB Code</b>                                                                                           | 6TRV                                |            |

313 \*Values in parentheses are for the outer shell

314 The asymmetric unit contained two monomers, assembled as a dimer with all 295  
 315 amino acids visible apart of the N-terminal methionine. SapL1 folds into the  
 316 canonical six-bladed  $\beta$ -propeller with six-binding sites at the interface between



317 blades typical for this family of lectin (Fig 4). A fucose moiety was found in 5 and 4  
318 of the six binding pockets of chains A and B, respectively while glycerol originating  
319 from the crystallizing solution was found in the other binding sites.

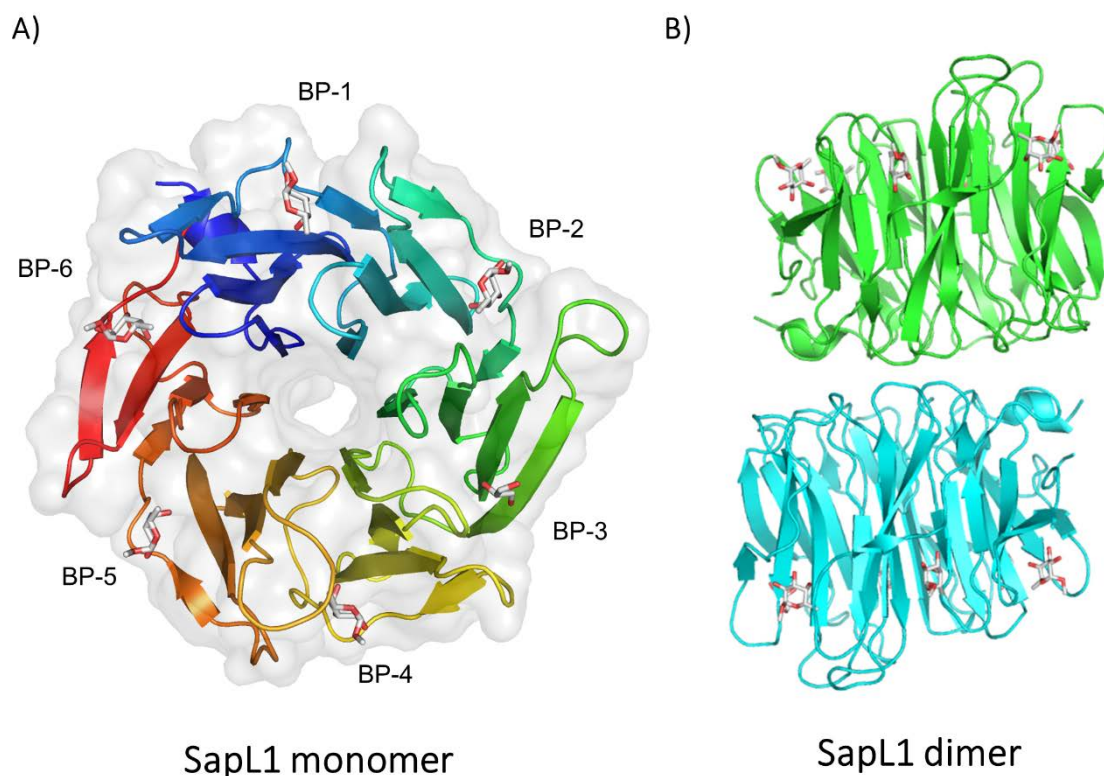

320

321 **Fig 4: SapL1 overall structure.** A) Surface and cartoon representation of SapL1 monomer colored  
322 from blue (*N*-terminal end) to red (*C*-terminal end). BP: Binding pockets. B) Representation of SapL1  
323 dimer colored by monomer with ligand depicted in sticks.

324 The overall fold of SapL1 and FleA as well as the overall dimer are very similar with  
325 a rmsd of 1.2 and 1.26 Å, respectively. They share 43% of sequence identity and both  
326 proteins present the same distribution of  $\beta$ -strands except for the lack of the last  
327 blade of strand 4 in SapL1, and the external face of blade 5, in which FleA displays  
328 an elongated  $\beta$ -strand ( $\beta$ 22) that is split in two in SapL1 ( $\beta$ 22/23). It is remarkable  
329 that the structure of the first 3 blades is highly conserved in both proteins, while the  
330 second half (blades 3-6) displays the largest discrepancies. Furthermore, FleA also



331 presents two additional small  $\alpha$ -turn ( $\eta_3$  and  $\eta_4$ ), located in the loops between sheets  
 332 that serve as connectors for blades (2/3 and 5/6, respectively, Fig 5).

333  
 334

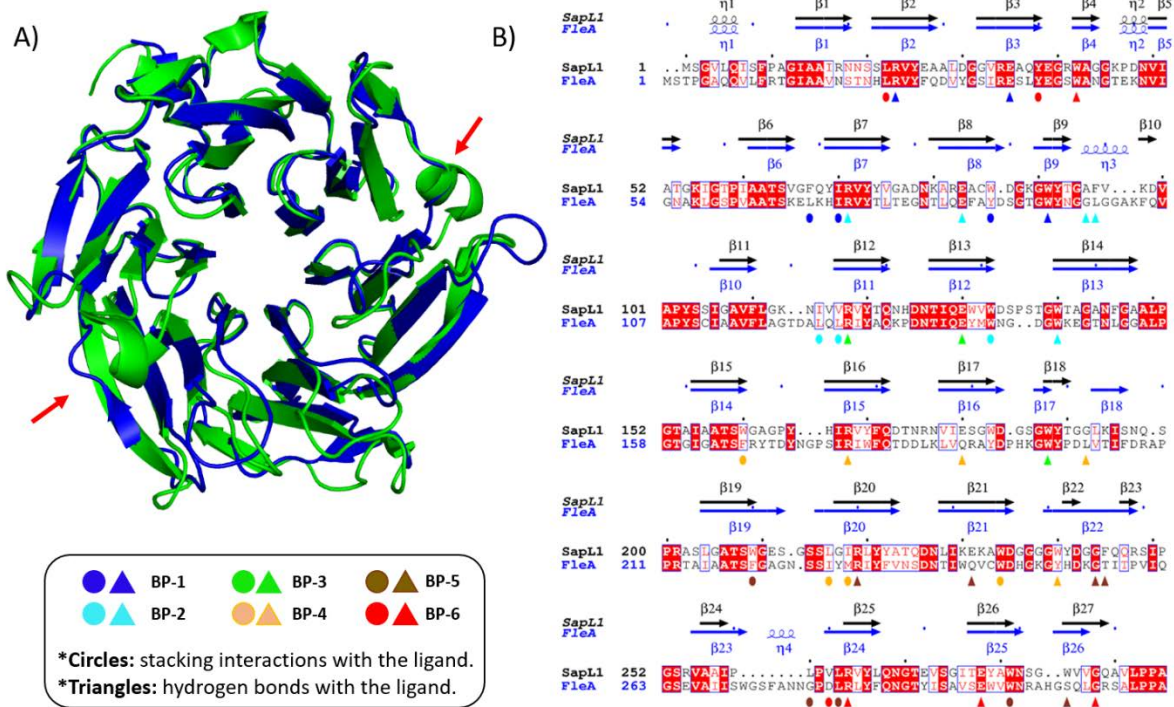

335

336 **Fig 5: SapL1/FleA comparison.** A) Overlay of SapL1 (blue, PDB: 6TRV)) and FleA (green, PDB:  
 337 4D4U) structures. Red arrows indicate the main differences between structures. B) Sequence  
 338 alignment of SapL1 and FleA with display of their secondary structure elements. The residues  
 339 involved in ligand interactions of each pocket are indicated by circles for hydrophobic and stacking  
 340 interactions and by triangles for hydrogen bonds colored according to the binding pocket: BP-1, blue;  
 341 BP-2 cyan; BP-3 green; BP-4, orange, BP-5, brown; BP-6, red.

342 Similar conclusions can be drawn when comparing SapL1 to its homologue AOL in  
 343 *Aspergillus oryzae* [47]. Those proteins have similar dimerization interface and we  
 344 noticed differences on the other side of the propeller where sugar binding occurs.  
 345 The lectins present surface loops of different size and sequence leading to a change  
 346 in the architecture of the related binding sites that impacts their affinity as discussed  
 347 in more details below. The first member structurally characterized in this lectin  
 348 family was AAL from the mushroom *Aleuria aurantia* [48]. It presents differences on

349 both sides of the  $\beta$ -propeller with the microfungus members of this family mainly at  
350 the level of the surface loops. This leads to a different dimerization interface and the  
351 dimer cannot overlay. This also affects fucose binding since AAL only has five  
352 functional binding sites. The role of these lectins is still unknown, in particular for  
353 the mushroom members.

#### 354 **Protein-ligand interactions**

355 Due to divergence in the tandem repeat sequence forming each blade of the  
356 propeller, the six binding sites of SapL1 monomer are not equivalent, but they share  
357 important conserved features. Hydrophobic interactions are observed between the  
358 C6 of the fucose and at least three residues of the protein (mainly isoleucine,  
359 tryptophan/tyrosine and leucine). The O2 and O3 hydroxyls make strong hydrogen  
360 bonds with a conserved triad of amino acid consisting of an arginine, a glutamic acid  
361 and a tryptophan. In the cases where glycerol was found in the binding pocket, its  
362 own hydroxyls mimic the interactions of fucose with these same residues (Fig 6). It  
363 is to be noted that SapL1 binding sites are more conserved than FleA binding site  
364 where a glutamine can replace the glutamic acid and a tyrosine the tryptophan in  
365 the triad (S4 Fig).

366 The O2 hydroxyl seemed to be the most versatile position, since it established  
367 interactions with a loop adjacent in four of the six binding sites (BPs 2, 4, 5 and 6).  
368 This is particularly interesting since the binding pockets that do not contain this loop  
369 (BPs 1 and 3) were mostly occupied by glycerol instead of fucose, indicating that  
370 those interactions could be responsible for enhancing the affinity and might be  
371 explored for development of inhibitors.

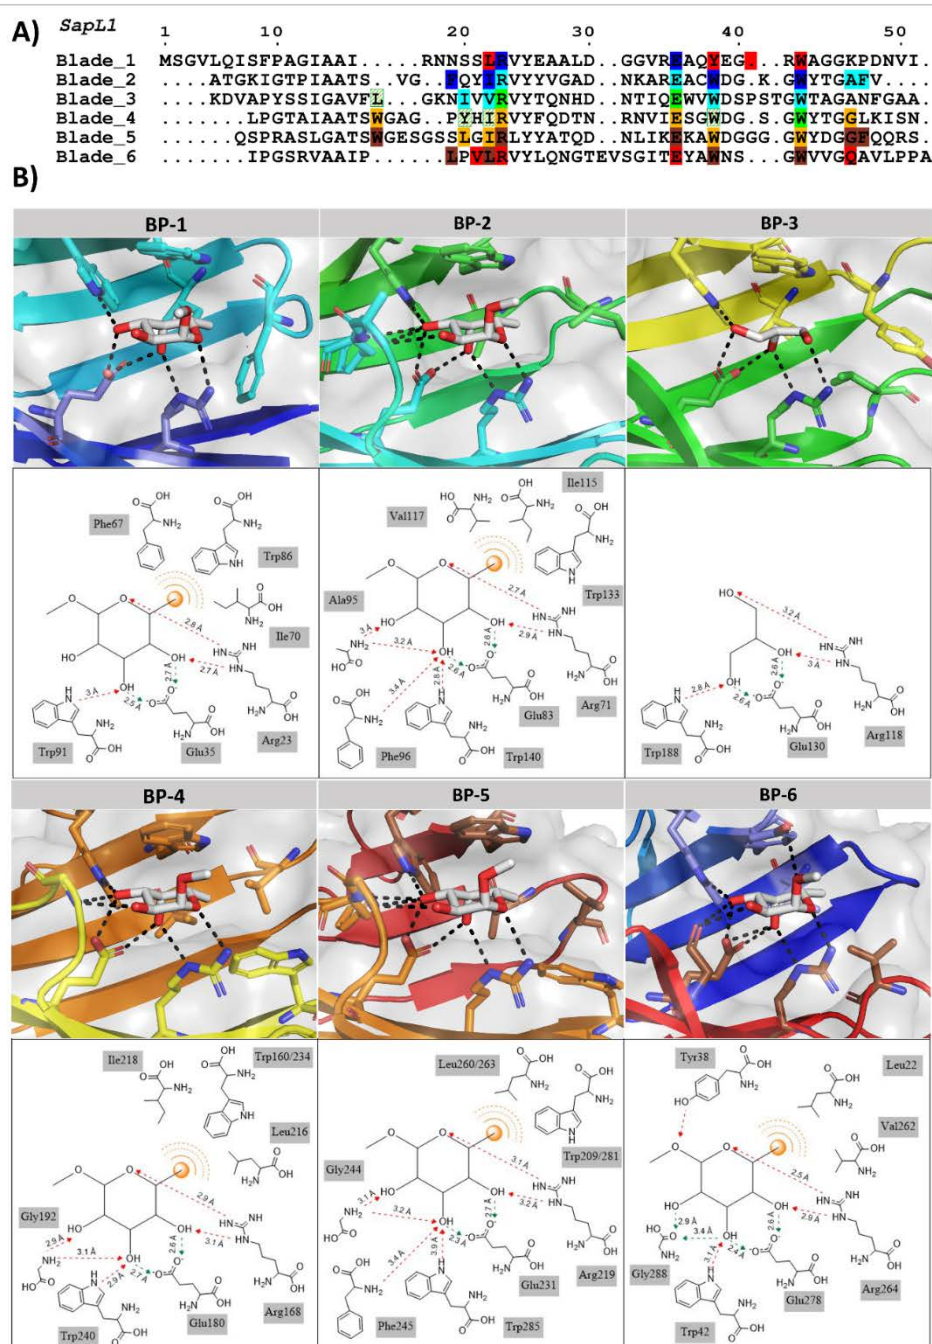

## 379 **Discussion**

380 The development of novel techniques for diagnosis has exposed that, until now, the  
381 incidence of fungal infections has been underestimated [1,49]. In comparison with  
382 pathogenic bacteria, which have been the focus of attention for several years, there  
383 is a lack of information about the virulence factors and host recognition systems of  
384 pathogenic fungi [50]. This hinders the development of new drugs against these  
385 microorganisms, while their resistance to the current ones is progressing quickly  
386 [13,24,49]. Therefore, there is an urgent need to obtain information that may  
387 contribute to the development of new antifungal agents.

388 In this study, we present the identification, production and characterization of a new  
389 carbohydrate binding protein from the emerging microfungus *S. apiospermum*,  
390 whose host-anchoring mechanism is completely unknown. To the best of our  
391 knowledge, this is the first studied lectin for this opportunistic pathogen. SapL1 is  
392 homologous to the conidial surface lectin FleA from *A. fumigatus* known to be  
393 involved in adhesion to the host glycoconjugates present in mucins and human lung  
394 epithelium [31]. During our analysis, we have identified a possible shift in the ORF  
395 of SapL1 and we have relayed this information to corroborate this finding and to  
396 update the entry if necessary.

397 In our initial attempts to produce recombinant SapL1, we observe that the  
398 conventional parameters of expression in *E. coli*, result in the production of insoluble  
399 protein that was mainly found in inclusion bodies. Later, experimental data  
400 indicated that the presence of rhamnose or glycerol was required for SapL1  
401 solubilization during bacterial expression and that the production yield was directly  
402 proportional to their concentration in the culture medium. This suggests that the  
403 stabilization of SapL1 derives from an osmomodulator effect that, either directly or  
404 indirectly, enhances its proper folding. This osmomodulator effect may be due to



405 the leak of genetic repression by dissociation of the repressor (*LacI-DNA*) complex  
406 [36–38] in the first case, or in the second case to the increased concentration of  
407 organic osmoregulators, which are known to enhance protein folding and solubility,  
408 presumably also reinforced by the macromolecular crowding produced by  
409 plasmolysis [36–44]. These findings, and the extensive research carried out to  
410 produce SapL1 in its soluble form, provide important insights for the heterologous  
411 expression of eukaryotic lectins tending to be produced as insoluble proteins in *E.*  
412 *coli*. Besides, our findings highlight the useful role of organic osmoregulators during  
413 heterologous expression of proteins to favour their proper folding and to avoid the  
414 formation of inclusion bodies.

415 We demonstrated that SapL1 is strictly specific for fucosylated carbohydrates and  
416 recognized all blood group types present in the glycan array screening. These results  
417 are particularly interesting since it has been shown that there is a six times higher  
418 occurrence of fucose  $\alpha 1,3/4$  linked to glycoproteins in the CF airways [34]. This  
419 phenomenon is mainly due to an increased expression of the  $\alpha 1,3$ -  
420 fucosyltransferase, which is involved in the synthesis of sialyl-Lewis X and Lewis X  
421 determinants attached to mucus mucins [35]. Therefore, the fact that SapL1 equally  
422 recognizes the  $\alpha 1-2$  and  $\alpha 1-3/4$ -linked fucosides may explain the high incidence of  
423 scedosporiosis in CF patients. Besides, it correlates with the presence of the *SapL1*  
424 gene in all the pathogenic strains of *Scedosporium* whose genome has been sequenced  
425 to date. However, there is no evidence suggesting that the phenotype of blood group  
426 could have an influence in this recognition conversely to previous reports on other  
427 pathogens like *Pseudomonas aeruginosa* and *Haemophilus influenzae* [51–54].

428 Finally, the specificity and affinity of each one of the six binding pockets of SapL1  
429 has been deeply analyzed to highlight the features that must be explored for the  
430 design of efficient inhibitors. Within our analysis, we have found that the binding

431 pockets are non-equivalent but they all share the features necessary for fucose  
432 recognition. This example of divergence can also be found in the other lectins of the  
433 same family with FleA being the member with the greatest differences between  
434 pockets known to date [55]. It is remarkable that although SapL1 has a relatively low  
435 sequence identity with other members of this family, its specificity and affinity are  
436 very similar to those reported for FleA from *A. fumigatus* [46], AAL from the orange  
437 peel mushroom *Aleuria aurantia* [48] and the bacterial lectins BambL and RSL, from  
438 *Burkholderia ambifaria* and *Ralstonia solanacearum*, respectively [56,57]. Together with  
439 the crystallographic data, this confirms that the structure and function of this lectin  
440 family are highly conserved, settling the possibility for development of a broad-  
441 spectrum therapy.

442 Overall, our research has revealed the first insights about the recognition of human  
443 glycoconjugates by *S. apiospermum* lectins and contributes to the general  
444 understanding of the host-binding process during the early stages of infection. The  
445 detailed information exposed here, places SapL1 as a promising target for the  
446 diagnosis and/or treatment of *Scedosporium* infections and it will be of great value to  
447 guide the development of antiadhesive glycodrugs against this pathogen.

## 448 **Material and methods**

### 449 **Production**

450 The coding sequence for SapL1 was optimized for expression in *Escherichia coli* and  
451 ordered at Eurofins Genomics (Ebersberg, Germany) before cloning into the  
452 expression vectors pET-TEV [58], pET32-TEV [46] and pProNde. pProNde is a  
453 homemade vector where the NcoI restriction site of pProEx HTb (EMBL,  
454 Heidelberg) has been replaced by a NdeI restriction site by PCR. Then, plasmids

455 were introduced into *E. coli* strains by thermal shock at 42°C and different expression  
456 parameters were assayed (S1 Table) until soluble expression was achieved. The best  
457 set of conditions for SapL1 expression were: *E. coli* TRX strain, pProNde vector, LB  
458 medium, cells grown at 37°C and 160 rpm until 0.4 DO<sub>600</sub>, then cultures transferred  
459 to 16°C until 0.8 OD<sub>600nm</sub> and protein induction carried out overnight by the addition  
460 of isopropyl-β-D-1-thiogalactoside (IPTG) to a final concentration of 0.05 mM and  
461 1% L-rhamnose (Rh).

## 462 **Purification**

463 Cells were subsequently harvested by centrifugation at 5000 g for 10 min and  
464 resuspended in buffer A (50 mM Tris-HCl, 500 mM NaCl, pH 8.5). After addition of  
465 1 μl of Denarase (C-LEcta GmbH, Leipzig, Germany) and moderate agitation during  
466 30 minutes at room temperature, cells were disrupted at 1.9 kbar using a cell  
467 disruptor (Constant Ltd Systems). Cell debris were removed by centrifugation at  
468 22000 g for 30 minutes. The supernatant was filtered using 0.45 micrometer  
469 membranes (PES, ClearLine) and the protein purification was carried out by IMAC  
470 using 1 mL His-Trap FF columns (GE Healthcare Life Sciences) and a NGC™  
471 chromatography system (Bio-Rad). After loading the supernatant, the column was  
472 rinsed thoroughly with buffer A until stabilization of the baseline. Bound proteins  
473 were eluted through the addition of buffer B (50 mM Tris-HCl, 500 mM NaCl, 500  
474 mM Imidazole, pH 8.5) in an 0-500 mM imidazole gradient over 20 mL. Fractions  
475 containing SapL1 were pooled and concentrated by ultrafiltration (Pall, 10kDa cut-  
476 off) prior buffer exchange to 50 mM Tris-HCl, 100 mM NaCl, pH 8.5 using PD10  
477 desalting columns (GE Healthcare Life Sciences). Then, the fusion was cleaved off  
478 overnight at 19°C using the TEV protease produced in the lab in 1:50 ratio and  
479 addition of 0.5 mM EDTA and 0.25 mM TCEP. The sample was loaded on the His-  
480 trap column to separate the cleaved protein collected in the flow-through from the

481 TEV protease and potential uncleaved sample retained and eluted with imidazole.  
482 SapL1 containing fractions were concentrated by centrifugation to the desired  
483 concentration.

#### 484 **Size exclusion chromatography**

485 Size exclusion chromatography (SEC) was performed using a High-Resolution  
486 ENrich™ SEC 70 column (Bio-Rad) on NGC™ chromatography system (Bio-Rad).  
487 Column was equilibrated with 50 ml of buffer D (20 mM MES, 100 mM NaCl, pH  
488 6.5) and 200 µl of sample at 10 mg mL<sup>-1</sup> were injected into the system followed by 40  
489 ml isocratic elution on buffer D supplemented with 20 mM α-methyl fucoside, 0.1%  
490 L-rhamnose, 5 M NaCl, 2 M NaCl or 500 mM NaCl, according to the experiment.  
491 Fractions were monitored by the absorbance at 280 nm and 0.5 mL fractions were  
492 collected in the resolving region of the column.

#### 493 **Dynamic light scattering (DLS)**

494 DLS analyses were performed using a Zetasizer™ NanoS (Malvern Panalytical) with  
495 a 40 µl quartz cuvette. Measurements were performed in triplicate on protein sample  
496 at 1 mg·ml<sup>-1</sup> in buffer C (50 mM Tris-HCl, 100 mM NaCl, pH 8.5) after centrifugation.

#### 497 **Thermal Shift Assay (TSA)**

498 The thermal stability of SapL1 was analyzed by TSA with the MiniOpticon real-time  
499 PCR system (Bio-Rad). Prior assay, buffer stocks at 100 mM and a mixture  
500 containing 70 µl of SapL1 at 1 mg ml<sup>-1</sup>, 7 µl of 500x Sypro Orange (Merk Sigma-  
501 Aldrich,) and 63 µl of ultrapure H<sub>2</sub>O were prepared. Then, 7.5 µl of H<sub>2</sub>O, 12.5 µl of  
502 the corresponding buffer and 5 µl of the protein/Sypro mixture were mixed in 96-  
503 well PCR microplates. The heat exchange test was then carried out from 20°C to  
504 100°C with a heating rate of 1°C·min<sup>-1</sup>. Fluorescence intensity was measured with



505 Ex/Em: 490/530 nm and the data processing was performed with the CFX Manager  
506 software.

### 507 **Isothermal Titration Calorimetry (ITC)**

508 Experiments were performed using a Microcal ITC200 calorimeter (Malvern  
509 Panalytical) with 40  $\mu$ l of L-fucose 2.5 mM in the syringe and 200  $\mu$ l of protein 0.04  
510 mM in the sample cell. 2  $\mu$ l injections in a range of 120 seconds while stirring at 1000  
511 rpm were performed. Experimental data were adjusted to a theoretical titration  
512 curve by the Origin ITC Analysis software.

### 513 **Hemagglutination assay**

514 Agglutination test was performed with fresh rabbit erythrocytes (bioMérieux, Lyon)  
515 in U 96-well plates (Nalgene). For the test, 150 mM NaCl was used as a negative  
516 control and 1 mg ml<sup>-1</sup> LecB of *P. aeruginosa* as a positive control. 50  $\mu$ l of sample was  
517 prepared at 0.1 mg·ml<sup>-1</sup> and submitted to serial double dilutions. 50  $\mu$ l of rabbit  
518 erythrocytes 3% were added to each well prior incubation of the plate at room  
519 temperature. After 2 hours, the result of the experiment was evaluated and  
520 agglutination activity was calculated according to the dilution of the protein.

### 521 **Glycan arrays**

522 Protein was labeled with Fluorescein Isothiocyanate (FITC) (Merk Sigma-Aldrich)  
523 according to the supplier's instructions with slight modifications. Briefly two  
524 milligrams of protein were dissolved in 1 ml of buffer E (100 mM Na<sub>2</sub>CO<sub>3</sub>, 100 mM  
525 NaCl, pH 9); then, 40  $\mu$ l of FITC at 1 mg·ml<sup>-1</sup>, previously dissolved in DMSO, were  
526 gradually added to the protein solution and the mixture was gently stirred at room  
527 temperature overnight. Next day, the solution was supplemented with NH<sub>4</sub>Cl to a  
528 final concentration of 50 mM and free FITC was removed using PD10 column with  
529 PBS as mobile phase. Protein concentration was determined at A<sub>280</sub> and FITC at A<sub>490</sub>

530 using a NanoDrop™ 200 (Thermo Scientific) and Fluorescein/Protein molar ratio  
531 (F/P) was estimated by the following formula:

$$532 \quad \text{Molar } \frac{F}{P} = \frac{MW}{389} \times \frac{\frac{A_{495}}{195}}{[A_{280} - (0.35 \times A_{495})]E^{0.1\%}}$$

533 Where MW is the molecular weight of the protein, 389 is the molecular weight of FITC, 195 is the  
534 absorption E 0.1% of bound FITC at 490 nm at pH 13.0, (0.35 X A495) is the correction factor due to  
535 the absorbance of FITC at 280 nm, and E 0.1% is the absorption at 280 nm of a protein at 1.0 mg·ml<sup>-1</sup>,  
536 Being an ideal F/P should be 0.3 > 1.

537 Labeled lectin was sent to the Consortium for Functional Glycomics (CFG; Boston,  
538 MA, USA) and its binding properties were assayed at 5 and 50 µg·ml<sup>-1</sup> on a  
539 “Mammalian Glycan Array version 5.4” which contain 585 glycans in replicates of  
540 6. The highest and lowest signal of each set of replicates were eliminated and the  
541 average of the remaining data was normalized to the percentages of the highest RFU  
542 value for each analysis. Finally, the percentages for each glycan were averaged at  
543 different lectin concentrations.

#### 544 **Crystallization and data collection**

545 Crystal screening was performed using the hanging-drop vapour diffusion  
546 technique by mixing equal volumes of pure protein at 5 mg·ml<sup>-1</sup> and precipitant  
547 solutions from commercial screenings of Molecular Dimensions (Newmarket, UK).  
548 2 µl drops were incubated at 19°C until crystals appeared. A subsequent  
549 optimization of positive conditions for SapL1 crystallization was carried out and  
550 crystals suitable for X-ray diffraction analysis were obtained under solution  
551 containing 100 mM Bicine pH 8.5, 1.5 M ammonium sulfate (NH<sub>4</sub>)<sub>2</sub>SO<sub>4</sub> and 12% v/v  
552 glycerol. Crystals were soaked in mother liquor supplemented with 10% (v/v)  
553 glycerol, prior to flash cooling in liquid nitrogen. Data collection was performed on  
554 PX1 beamline at SOLEIL Synchrotron (Saint Aubin, FR) using a Pixel detector.

555 **Structure determination**

556 Data were processed using XDS [59] software and were converted to structure  
557 factors using the CCP4 program package v.6.1 [60], with 5% of the data reserved for  
558 Rfree calculation. The structure was determined using the molecular-replacement  
559 method with Phaser v.2.5 [61], using the structure of FleA dimer (PDB entry 4D4U  
560 [30]) as starting model. Model refinement was performed using REFMAC 5.8 [62]  
561 alternated with manual model building in Coot v.0.7 [63]. Sugar residues and other  
562 compounds that were present were placed manually using Coot and validated using  
563 Privateer [64]. The final model has been validated and deposited in the PDB  
564 Database with accession number 6TRV.

565 **Figures**

566 Figures were created using PyMOL Version 1.8.4 (Schrödinger), ChemDraw Version  
567 15, ESPript Version 3.0 [65], and PowerPoint 16.

568

569 **Author Contributions:** Conceptualization: A.V.; formal analysis: A.V. and D.M.A.;  
570 investigation: D.M.A.; methodology: A.V. and D.M.A.; visualization: A.V. and  
571 D.M.A.; writing—original draft preparation: D.M.A.; writing—review and editing:  
572 A.V., R.P. and D.M.A; supervision: A.V. and R.P.; project administration: A.V.;  
573 funding acquisition: A.V. All authors have read and agreed to the published version  
574 of the manuscript.

575 **Funding:** This project has received funding from the European Union’s Horizon  
576 2020 research and innovation program under the Marie Skłodowska-Curie grant  
577 (765581), from the French cystic fibrosis association Vaincre la Mucoviscidose. The  
578 project was also supported by Glyco@Alps (ANR-15-IDEX02).

579 **Acknowledgments:** We would like to thank to Valérie Chazalet and Emilie Gillon  
580 for their technical assistance. Thanks to Prof. Jean-Philippe Bouchara from the  
581 University of Angers, France for giving us access to the genomic data prior their  
582 release, for his discussion on the microfungi and for his comments on the  
583 manuscript. We also would like to thank for access to the beamlines BM30A-FIP at  
584 the European Synchrotron Radiation Facility (ESRF), Grenoble, France where initial  
585 tests were performed and Proxima 1 at SOLEIL Synchrotron, Saint Aubin, France  
586 (proposal number 20170827), where final data were collected. Thanks to our local  
587 contacts Jean-Luc Ferrer, Serena Sirigu, and Pierre Legrand for their assistance and  
588 technical support.

589 **Conflicts of Interest:** The authors declare no conflict of interest.

590

591

## 592 References

- 593 1. Tuite NL, Lacey K. Overview of invasive fungal infections. In: O'Connor L,  
594 Glynn B, editors. Fungal Diagnostics. NY: Humana Press, Totowa, NJ; 2013. pp.  
595 1–23. doi:10.1007/978-1-62703-257-5.
- 596 2. Ramirez-Garcia A, Pellon A, Rementeria A, Buldain I, Barreto-Bergter E, Rollin-  
597 Pinheiro R, et al. *Scedosporium* and *Lomentospora*: An updated overview of  
598 underrated opportunists. Med Mycol. 2018;56: S102–S125.  
599 doi:10.1093/mmy/myx113.
- 600 3. Goldman C, Akiyama MJ, Torres J, Louie E, Meehan SA. *Scedosporium*  
601 *apiospermum* infections and the role of combination antifungal therapy and GM-  
602 CSF: a case report and review of the literature. Med Mycol Case Rep. 2016;11:  
603 40–43. doi:10.1016/j.mmcr.2016.04.005.
- 604 4. Rammaert B, Puyade M, Cornely OA, Seidel D, Grossi P, Husain S, et al.  
605 Perspectives on *Scedosporium* species and *Lomentospora prolificans* in lung  
606 transplantation: Results of an international practice survey from ESCMID fungal  
607 infection study group and study group for infections in compromised hosts, and  
608 European. Transpl Infect Dis. 2019;21: 1–8. doi:10.1111/tid.13141.
- 609 5. Luplertlop N. *Pseudallescheria/Scedosporium* complex species: from saprobic to  
610 pathogenic fungus. J Mycol Med. 2018;28: 249–256.  
611 doi:10.1016/j.mycmed.2018.02.015.
- 612 6. Gilgado F, Cano J, Gené J, Guarro J. Molecular phylogeny of the *Pseudallescheria*  
613 *boydii* species complex: proposal of two new species. J Clin Microbiol. 2005;43:  
614 4930–4942. doi:10.1128/JCM.43.10.4930-4942.2005.
- 615 7. Duvaux L, Shiller J, Vandeputte P, Bernonville TD De, Thornton C, Papon N, et  
616 al. Draft genome sequence of the human-pathogenic fungus *Scedosporium boydii*.  
617 Genome Announc. 2017;5: e00871-17. doi:10.1128/genomeA.00871-17.

- 618 8. Pérez-Bercoff Å, Papanicolaou A, Ramsperger M, Kaur J, Patel HR, Harun A, et  
619 al. Draft genome of Australian environmental strain WM 09.24 of the  
620 opportunistic human pathogen *Scedosporium aurantiacum*. Genome Announc.  
621 2015;3: e01526-14. doi:10.1128/genomeA.01526-14.
- 622 9. Vandeputte P, Ghamrawi S, Rechenmann M, Iltis A, Giraud S, Fleury M, et al.  
623 Draft genome sequence of the pathogenic fungus *Scedosporium apiospermum*.  
624 Genome Announc. 2014;2: e00988-14. doi:10.1128/genomea.00988-14.
- 625 10. Pereira De Mello T, Aor AC, Santiago S, De Oliveira C, Branquinha MH, Luis A.  
626 Conidial germination in *Scedosporium apiospermum*, *S . aurantiacum*, *S .*  
627 *minutisporum* and *Lomentospora prolificans*: influence of growth conditions and  
628 antifungal susceptibility profiles. Mem Inst Oswaldo Cruz. 2016;111: 484–494.  
629 doi:10.1590/0074-02760160200.
- 630 11. Tortorano AM, Richardson M, Roilides E, van Diepeningen A, Caira M, Munoz  
631 P, et al. ESCMID and ECMM joint guidelines on diagnosis and management of  
632 hyalohyphomycosis: *Fusarium spp.*, *Scedosporium spp.* and others. Clin Microbiol  
633 Infect. 2014;20: 27–46. doi:10.1111/1469-0691.12465.
- 634 12. Troke P, Aguirrebengoa K, Arteaga C, Ellis D, Heath CH, Lutsar I, et al.  
635 Treatment of scedosporiosis with voriconazole: clinical experience with 107  
636 patients. Antimicrob Agents Chemother. 2008;52: 1743–1750.  
637 doi:10.1128/AAC.01388-07.
- 638 13. Rodriguez-tudela JL, Guarro J, Kantarcioglu AS, Horre R, Estrella MC,  
639 Berenguer J, et al. *Scedosporium apiospermum*: changing clinical spectrum of a  
640 therapy-refractory opportunist. Med Mycol. 2006;44: 295–327.  
641 doi:10.1080/13693780600752507.
- 642 14. Cortez KJ, Roilides E, Quiroz-telles F, Meletiadis J, Antachopoulos C, Knudsen  
643 T, et al. Infections caused by *Scedosporium spp.* Clin Microbiol Rev. 2008;21:  
644 157–197. doi:10.1128/CMR.00039-07

- 645 15. Theuretzbacher U, Piddock LJ V. Non-traditional antibacterial therapeutic  
646 options and challenges. *Cell Host Microbe*. 2019;26: 61–72.  
647 doi:10.1016/j.chom.2019.06.004
- 648 16. Krachler AM, Orth K. Targeting the bacteria-host interface strategies in anti-  
649 adhesion therapy. *Virulence*. 2013;4: 284–294. doi:10.4161/viru.24606
- 650 17. Ofek I, Hasty DL, Sharon N. Anti-adhesion therapy of bacterial diseases:  
651 prospects and problems. *FEMS Immunol Med Microbiol*. 2003;38: 181–191.  
652 doi:10.1016/S0928-8244(03)00228-1
- 653 18. Pinto MR, De Sá ACM, Limongi CL, Rozental S, Santos ALS, Barreto-Bergter E.  
654 Involvement of peptidorhamnomannan in the interaction of *Pseudallescheria*  
655 *boydii* and HEP2 cells. *Microbes Infect*. 2004;6: 1259–1267.  
656 doi:10.1016/j.micinf.2004.07.006
- 657 19. Pinto MR, Gorin PAJ, Wait R, Mulloy B, Barreto-Bergter E. Structures of the O-  
658 linked oligosaccharides of a complex glycoconjugate from *Pseudallescheria boydii*.  
659 *Glycobiology*. 2005;15: 895–904. doi:10.1093/glycob/cwi084
- 660 20. Figueiredo RT, Fernandez PL, Dutra FF, Gonza Y, Cristina L, Bittencourt VCB,  
661 et al. TLR4 recognizes *Pseudallescheria boydii* conidia and purified  
662 rhamnomannans. *J Biol Chem*. 2010;285: 40714–40723.  
663 doi:10.1074/jbc.M110.181255
- 664 21. Bittencourt VCB, Figueiredo RT, Silva RB, Moura DS, Fernandez PL, Sasaki GL,  
665 et al. An α-glucan of *Pseudallescheria boydii* is involved in fungal phagocytosis  
666 and Toll-like receptor activation. *J Biol Chem*. 2006;281: 22614–22623.  
667 doi:10.1074/jbc.M511417200
- 668 22. Ghamrawi S, Renier G, Saulnier P, Cuenot S, Zykwincka A, Dutilh BE, et al. Cell  
669 wall modifications during conidial maturation of the human pathogenic fungus  
670 *Pseudallescheria boydii*. *PLoS One*. 2014;9: e100290.  
671 doi:10.1371/journal.pone.0100290

- 672 23. Rollin-Pinheiro R, Liporagi-Lopes LC, Meirelles JV De, Souza LM De.  
673 Characterization of *Scedosporium apiospermum* glucosylceramides and their  
674 involvement in fungal development and macrophage functions. PLoS One.  
675 2014;9: e98149. doi:10.1371/journal.pone.0098149
- 676 24. Mello TP De, Aor AC, Gonçalves DDS, Seabra SH, Branquinha MH, Luis A.  
677 *Scedosporium apiospermum*, *Scedosporium aurantiacum*, *Scedosporium minutisporum*  
678 and *Lomentospora prolificans*: a comparative study of surface molecules produced  
679 by conidial and germinated conidial cells. Mem Inst Oswaldo Cruz. 2018;113: 1–  
680 8. doi:10.1590/0074-02760180102
- 681 25. Shoaf-sweeney KD, Hutkins RW. Adherence, anti-adherence, and  
682 oligosaccharides: preventing pathogens from sticking to the host. Adv. in Food  
683 Nut. Res. 2009;55. 101–161. doi:10.1016/S1043-4526(08)00402-6
- 684 26. Sharon N. Carbohydrates as future anti-adhesion drugs for infectious diseases.  
685 Biochim Biophys Acta. 2006;1760: 527–537. doi:10.1016/j.bbagen.2005.12.008
- 686 27. Sharon N, Ofek I. Safe as mother’s milk: carbohydrates as future anti-adhesion  
687 drugs for bacterial diseases. Glycoconjugate J. 2000;17: 659–664.  
688 doi:10.1023/a:1011091029973
- 689 28. Tamburrini A, Colombo C, Bernardi A. Design and synthesis of glycomimetics:  
690 Recent advances. Med Res Rev. 2020;40: 495–531. doi:10.1002/med.21625
- 691 29. Sattin S, Bernardi A. Glycoconjugates and glycomimetics as microbial anti-  
692 adhesives. Trends Biotechnol. 2016;34: 483–495. doi:10.1016/j.tibtech.2016.01.004
- 693 30. Houser J, Komarek J, Kostlanova N, Cioci G, Varrot A, Kerr SC, et al. A soluble  
694 fucose-specific lectin from *Aspergillus fumigatus* conidia - structure, specificity  
695 and possible role in fungal pathogenicity. PLoS One. 2013;8: e83077.  
696 doi:10.1371/journal.pone.0083077
- 697 31. Kerr SC, Fischer GJ, Sinha M, McCabe O, Palmer M, Choera T, et al. FleA  
698 expression in *Aspergillus fumigatus* is recognized by fucosylated structures on



- 699 mucins and macrophages to prevent lung infection. PLoS Pathog. 2016;  
700 e1005555. doi:10.1371/journal.ppat.1005555
- 701 32. Sakai K, Hiemori K, Tateno H, Hirabayashi J, Gono T. Fucose-specific lectin of  
702 *Aspergillus fumigatus*: binding properties and effects on immune response  
703 stimulation. Med Mycol. 2019;57: 71–83. doi:10.1093/mmy/myx163
- 704 33. Thornton DJ, Rousseau K, McGuckin MA. Structure and function of the  
705 polymeric mucins in airways mucus. Annu Rev Physiol. 2008;70: 459–486.  
706 doi:10.1146/annurev.physiol.70.113006.100702
- 707 34. Glick MC, Kothari VA, Liu A, Stoykova LI, Scanlin TF. Activity of  
708 fucosyltransferases and altered glycosylation in cystic fibrosis airway epithelial  
709 cells. Biochimie. 2001;83: 743–747. doi:10.1016/s0300-9084(01)01323-2
- 710 35. Lamblin G, Degroote S, Perini JM, Delmotte P, Scharfman A, Davril M, et al.  
711 Human airway mucin glycosylation: a combinatorial of carbohydrate  
712 determinants which vary in cystic fibrosis. Glycoconj J. 2001;18: 661–684.  
713 doi:10.1023/A:1020867221861
- 714 36. Frank DE, Saecker RM, Bond JP, Capp MW, Tsodikov O V, Melcher SE, et al.  
715 Thermodynamics of the interactions of Lac repressor with variants of the  
716 symmetric Lac operator: effects of converting a consensus site to a non-specific  
717 site. J Mol Biol. 1997;267: 1186–1206. doi:10.1006/jmbi.1997.0920
- 718 37. Capp MW, Cayley DS, Zhang W, Guttman HJ, Melcher SE, Saecker RM, et al.  
719 Compensating effects of opposing changes in putrescine (2+) and K+  
720 concentrations on lac repressor-lac operator binding: *in vitro* thermodynamic  
721 analysis and *in vivo* relevance. J Mol Biol. 1996;258: 25–36.  
722 doi:10.1006/jmbi.1996.0231
- 723 38. Cayley S, Lewis BA, Guttman HJ, Record MT. Characterization of the cytoplasm  
724 of *Escherichia coli* K-12 as a function of external osmolarity implications for  
725 protein-DNA interactions *in vivo*. J Mol Biol. 1991;222: 281–300.

- 726        doi:10.1016/0022-2836(91)90212-o
- 727    39. Richeys B, Cayley DS, Mossing MC, Kolka C, Anderson CF, Farrar TC, et al.  
728        Variability of the intracellular ionic environment of *Escherichia coli*. Differences  
729        between *in vitro* and *in vivo* effects of ion concentrations on protein-DNA  
730        interactions and gene expression. J Biol Chem. 1987;262: 7157–7164.
- 731    40. Harries D, Rosgen J. A practical guide on how osmolytes modulate  
732        macromolecular properties. Methods Cell Biology. 2008;84. 679–735.  
733        doi:10.1016/S0091-679X(07)84022-2
- 734    41. Massiah MA, Wright KM, Du H. Obtaining soluble folded proteins from  
735        inclusion bodies using sarkosyl, Triton X-100, and CHAPS: application to LB  
736        and M9 minimal media. Curr Protoc Protein Sci. 2016;84: 1–24.  
737        doi:10.1002/0471140864.ps0613s84
- 738    42. Pettitt BM, Bolen DW. Protein folding, stability, and solvation structure in  
739        osmolyte solutions. Biophys J. 2005;89: 2988–2997.  
740        doi:10.1529/biophysj.105.067330
- 741    43. Singh LR, Poddar NK, Dar TA, Rahman S, Kumar R, Ahmad F. Forty years of  
742        research on osmolyte-induced protein folding and stability. J Iran Chem Soc.  
743        2011;8: 1–23.
- 744    44. Ajito S, Iwase H, Takata S, Hirai M. Sugar-mediated stabilization of protein  
745        against chemical or thermal denaturation. J Phys Chem B. 2018;122: 8685–8697.  
746        doi:10.1021/acs.jpcc.8b06572
- 747    45. Bonnardel F, Kumar A, Wimmerova M, Lahmann M, Perez S, Varrot A, et al.  
748        Architecture and evolution of blade assembly in  $\beta$ -propeller lectins. Structure.  
749        2019;27: 764-775.e3. doi:10.1016/j.str.2019.02.002
- 750    46. Lehot V, Brissonnet Y, Dussouy C, Brument S, Cabanettes A, Gillon E, et al.  
751        Multivalent fucosides with nanomolar affinity for the *Aspergillus fumigatus* lectin  
752        FleA prevent spore adhesion to pneumocytes. Chemistry. 2018;24: 19243–19249.

- 753        doi:10.1002/chem.201803602
- 754    47. Makyio H, Shimabukuro J, Suzuki T, Imamura A, Ishida H, Kiso M, et al. Six  
755        independent fucose-binding sites in the crystal structure of *Aspergillus oryzae*  
756        lectin. *Biochem Biophys Res Commun.* 2016;477: 477–482.  
757        doi:10.1016/j.bbrc.2016.06.069
- 758    48. Wimmerova M, Mitchell E, Sanchez JF, Gautier C, Imberty A. Crystal structure  
759        of fungal lectin. Six-bladed  $\beta$ -propeller fold and novel fucose recognition mode  
760        for *Aleuria aurantia* lectin. *J Biol Chem.* 2003;278: 27059–27067.  
761        doi:10.1074/jbc.M302642200
- 762    49. Debourgogne A, Dorin J, Machouart M. Emerging infections due to filamentous  
763        fungi in humans and animals: only the tip of the iceberg? *Environ Microbiol Rep.*  
764        2016;8: 332–342. doi:10.1111/1758-2229.12404
- 765    50. Hogan LH, Klein BS, Levitz SM. Virulence factors of medically important fungi.  
766        *Clin Microbiol Rev.* 1996;9: 469–488. doi:10.1128/CMR.9.4.469-488.1996
- 767    51. Kuo KC, Kuo HC, Huang LT, Lin CS, Yang SN. The clinical implications of ABO  
768        blood groups in *Pseudomonas aeruginosa* sepsis in children. *J Microbiol Immunol*  
769        *Infect.* 2013;46: 109–114. doi:10.1016/j.jmii.2012.01.003
- 770    52. Gilboa-Garber N, Sudakevitz D, Sheffi M, Sela R, Levene C. PA-I and PA-II lectin  
771        interactions with the ABO(H) and P blood group glycosphingolipid antigens  
772        may contribute to the broad spectrum adherence of *Pseudomonas aeruginosa* to  
773        human tissues in secondary infections. *Glycoconj J.* 1994;11: 414–417.  
774        doi:10.1007/BF00731276
- 775    53. Scanlin TF, Glick MC. Terminal glycosylation in cystic fibrosis. *Biochim Biophys*  
776        *Acta.* 1999;1455: 241–253. doi:10.1016/S0925-4439(99)00059-9
- 777    54. Taylor-Cousar JL, Zariwala MA, Burch LH, Pace RG, Drumm ML, Calloway H,  
778        et al. Histo-blood group gene polymorphisms as potential genetic modifiers of  
779        infection and cystic fibrosis lung disease severity. *PLoS One.* 2009;4: e4270.

- 780        doi:10.1371/journal.pone.0004270
- 781    55. Houser J, Komarek J, Cioci G, Varrot A, Imberty A, Wimmerova M. Structural  
782        insights into *Aspergillus fumigatus* lectin specificity: AFL binding sites are  
783        functionally non-equivalent. *Acta Crystallogr Sect D Biol Crystallogr*. 2015; 442–  
784        453. doi:10.1107/S1399004714026595
- 785    56. Audfray A, Claudinon J, Abounit S, Ruvoe N, Smith DF, Pendu J Le, et al.  
786        Fucose-binding lectin from opportunistic pathogen *Burkholderia ambifaria* binds  
787        to both plant and human oligosaccharidic epitopes. *J Biol Chem*. 2012;287: 4335–  
788        4347. doi:10.1074/jbc.M111.314831
- 789    57. Kostlanova N, Mitchell EP, Lortat-Jacob H, Oscarson S, Lahmann M, Gilboa-  
790        Garber N, et al. The fucose-binding lectin from *Ralstonia solanacearum*. A new  
791        type of  $\beta$ -propeller architecture formed by oligomerization and interacting with  
792        fucoside, fucosyllactose, and plant xyloglucan. *J Biol Chem*. 2005;280: 27839–  
793        27849. doi:10.1074/jbc.M505184200
- 794    58. Houben K, Marion D, Tarbouriech N, Ruigrok RWH, Blanchard L. Interaction  
795        of the C-terminal domains of sendai virus N and P proteins: comparison of  
796        polymerase-nucleocapsid interactions within the paramyxovirus family. *J Virol*.  
797        2007;81: 6807–6816. doi:10.1128/jvi.00338-07
- 798    59. Kabsch W. XDS. *Acta Crystallogr*. 2010;66: 125–132.  
799        doi:10.1107/S0907444909047337
- 800    60. Winn MD, Ballard CC, Cowtan KD, Dodson EJ, Emsley P, Evans PR, et al.  
801        Overview of the CCP4 suite and current developments. *Acta Crystallogr Sect D*  
802        *Biol Crystallogr*. 2011;67: 235–242. doi:10.1107/S0907444910045749
- 803    61. McCoy AJ, Grosse-Kunstleve RW, Adams PD, Winn MD, Storoni LC, Read RJ.  
804        Phaser crystallographic software. *J Appl Crystallogr*. 2007;40: 658–674.  
805        doi:10.1107/S0021889807021206
- 806    62. Murshudov GN, Nicholls RA. REFMAC 5 for the refinement of macromolecular

- 807 crystal structures. *Acta Crystallogr Sect D Biol Crystallogr*. 2011;67: 355–367.  
808 doi:10.1107/S0907444911001314
- 809 63. Emsley P, Lohkamp B. Features and development of Coot. *Acta Crystallogr Sect*  
810 *D Biol Crystallogr*. 2010;66: 486–501. doi:10.1107/S0907444910007493
- 811 64. Aguirre J, Iglesias-Fernandez J, Rovira C, Davies GJ, Wilson KS, Cowtan KD.  
812 Privateer: software for the conformational validation of carbohydrate structures.  
813 *Nat Struct Mol Biol*. 2015;22: 833–834. doi:<https://doi.org/10.1038/nsmb.3115>.
- 814 65. Robert X, Gouet P. Deciphering key features in protein structures with the new  
815 ENDscript server. *Nucleic Acids Res*. 2014;42: 320–324. doi:10.1093/nar/gku316.  
816  
817
